# Supplementary material for: MagC, magnetic collection of ultrathin sections for volumetric correlative light and electron microscopy
Source: eLife journal article supplement (doi:10.7554/elife.45696), 2019-07-11
Supplement: supp [file elife-45696-supp-v1.zip]

Archive with 12 entries (12 files):
- elife_poa_e45696_Figure_2_figure_supplement_5.png
- elife_poa_e45696_Transparent_Reporting_File.pdf
- elife_poa_e45696_Figure_2_figure_supplement_6.png
- elife_poa_e45696_Figure_1_figure_supplement_1.png
- elife_poa_e45696_Figure_1_figure_supplement_3.png
- elife_poa_e45696_Figure_2_figure_supplement_1.png
- elife_poa_e45696_Figure_2_figure_supplement_2.png
- elife_poa_e45696_Figure_2_figure_supplement_4.png
- elife_poa_e45696_Figure_1_figure_supplement_4.png
- elife_poa_e45696_Figure_1_figure_supplement_2.png
- elife_poa_e45696_Figure_1_figure_supplement_5.png
- elife_poa_e45696_Figure_2_figure_supplement_3.png
