# Supplementary figures and images for: MagC, magnetic collection of ultrathin sections for volumetric correlative light and electron microscopy
Source: eLife journal article supplement (doi:10.7554/elife.45696), 2019-07-11

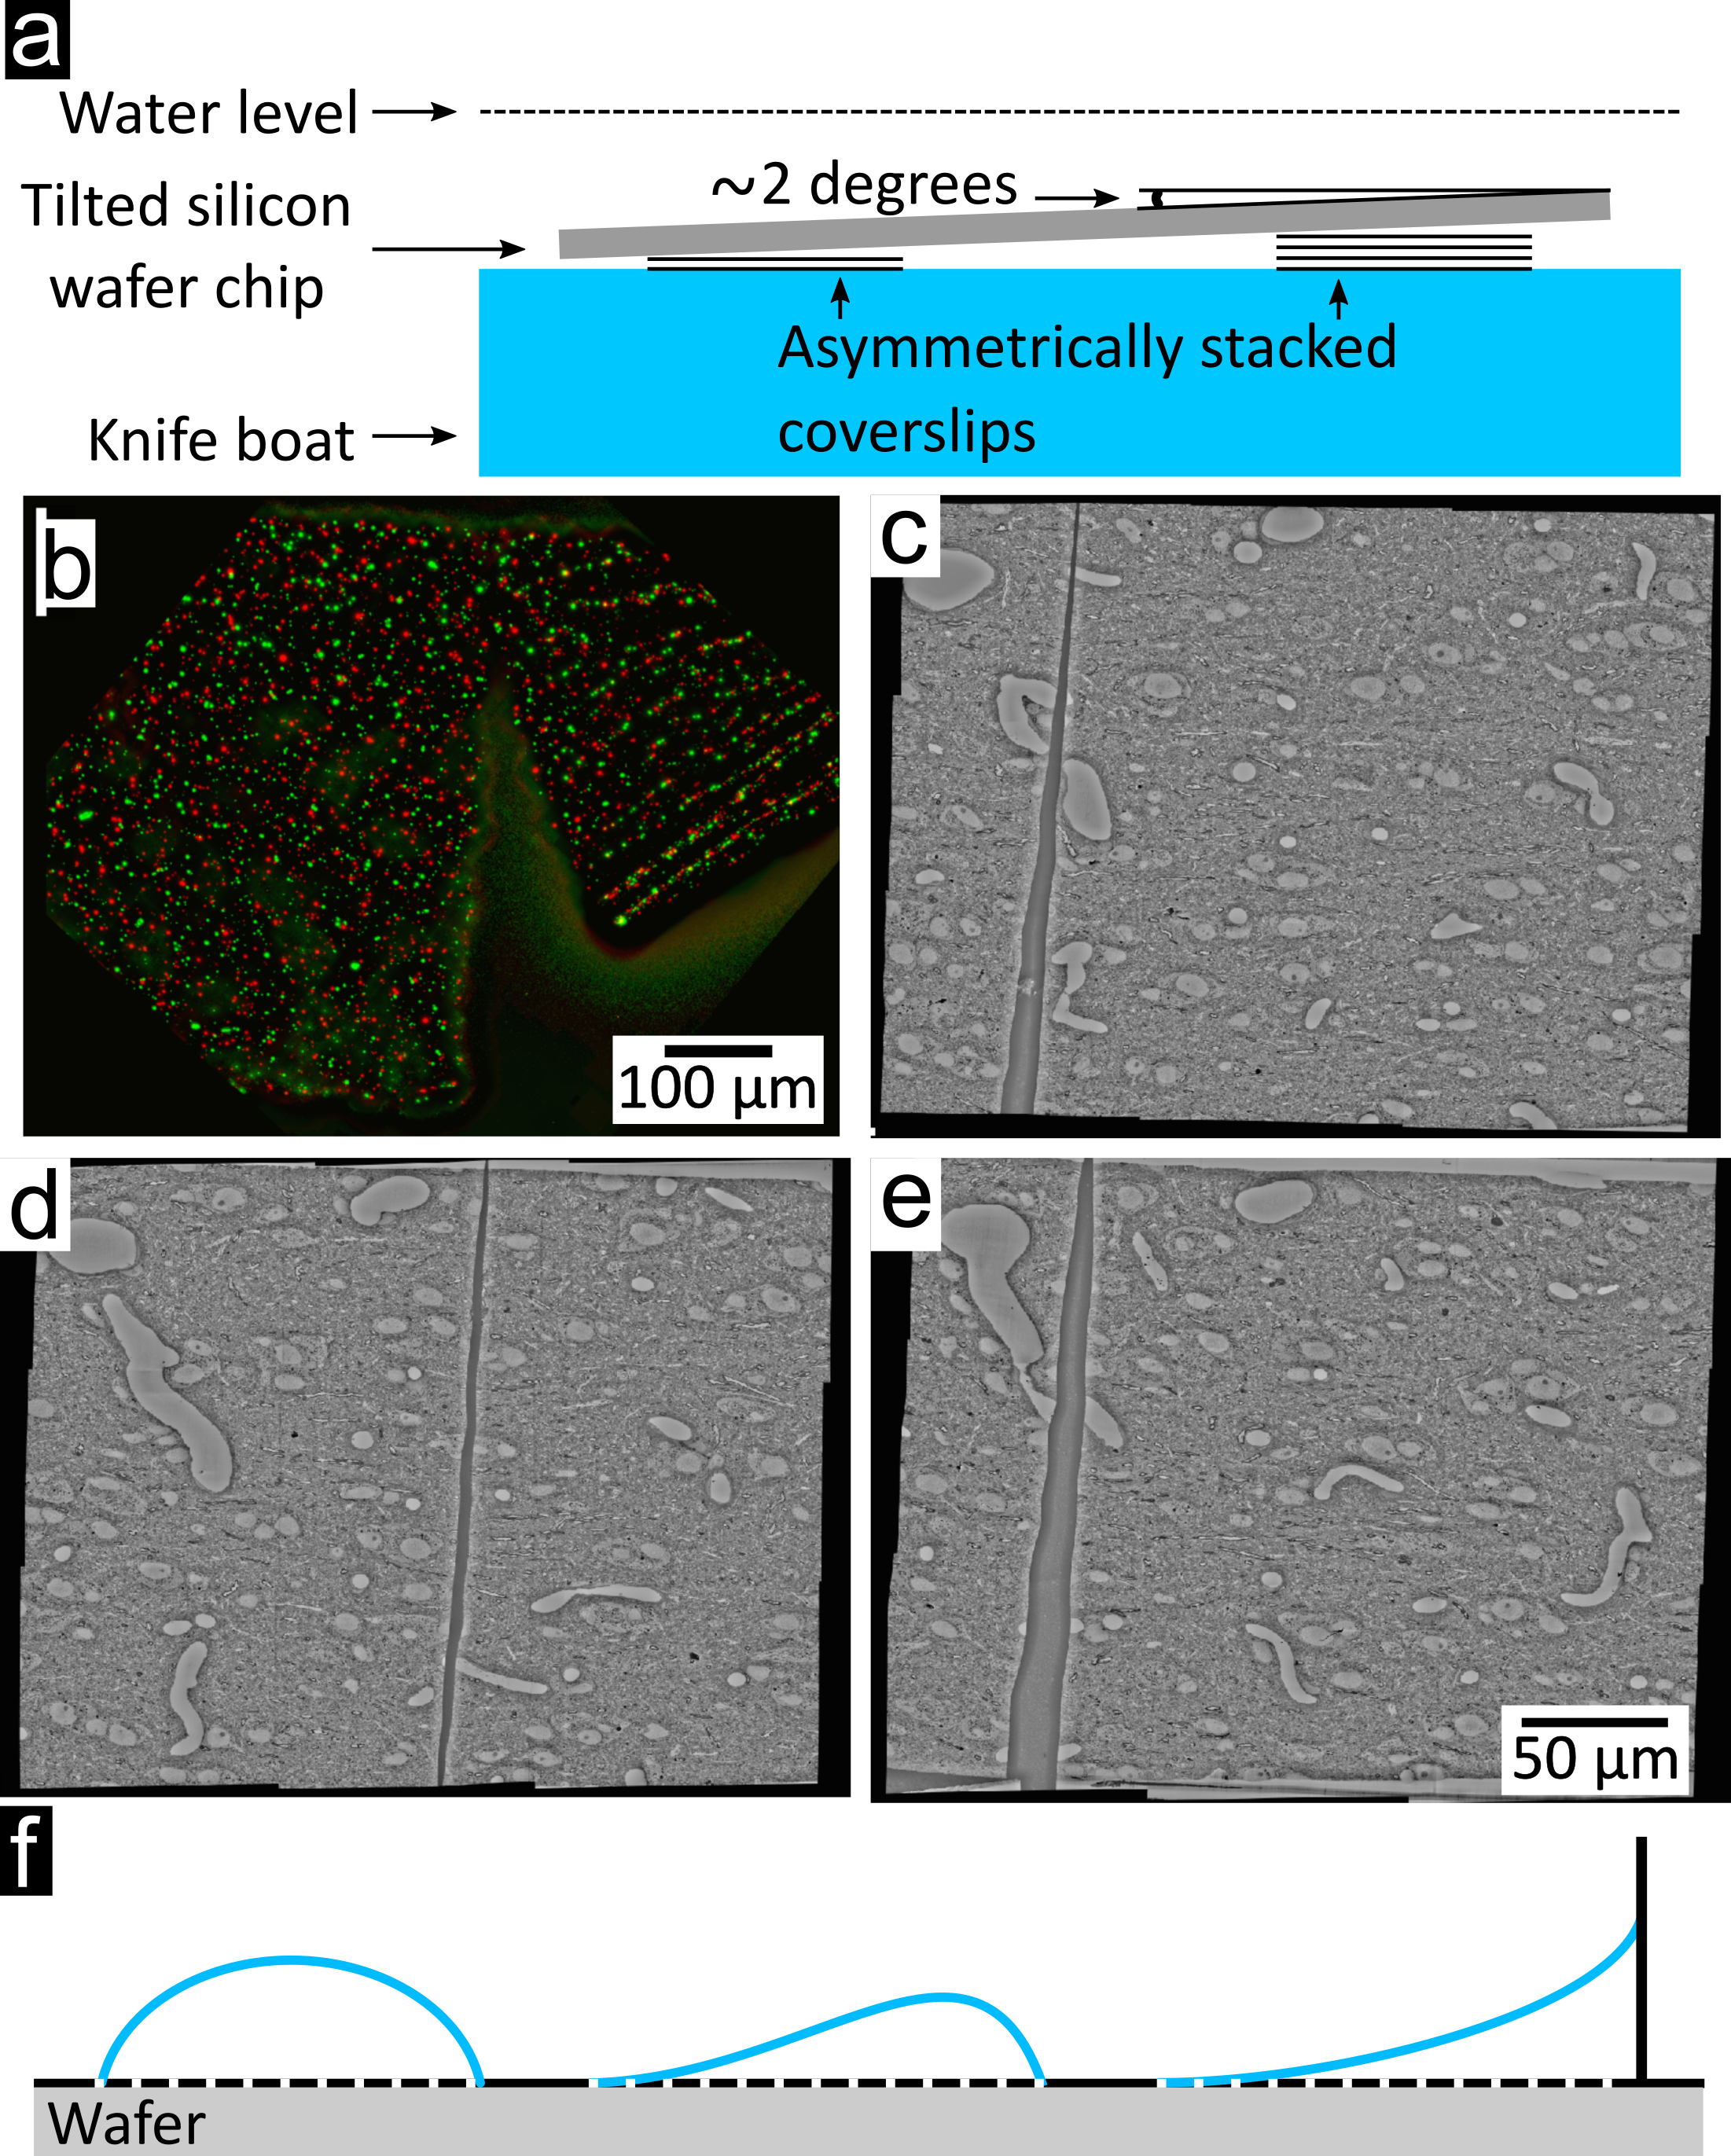

Supplement: supp [file elife-45696-supp-v1.zip › elife_poa_e45696_Figure_2_figure_supplement_5.png]

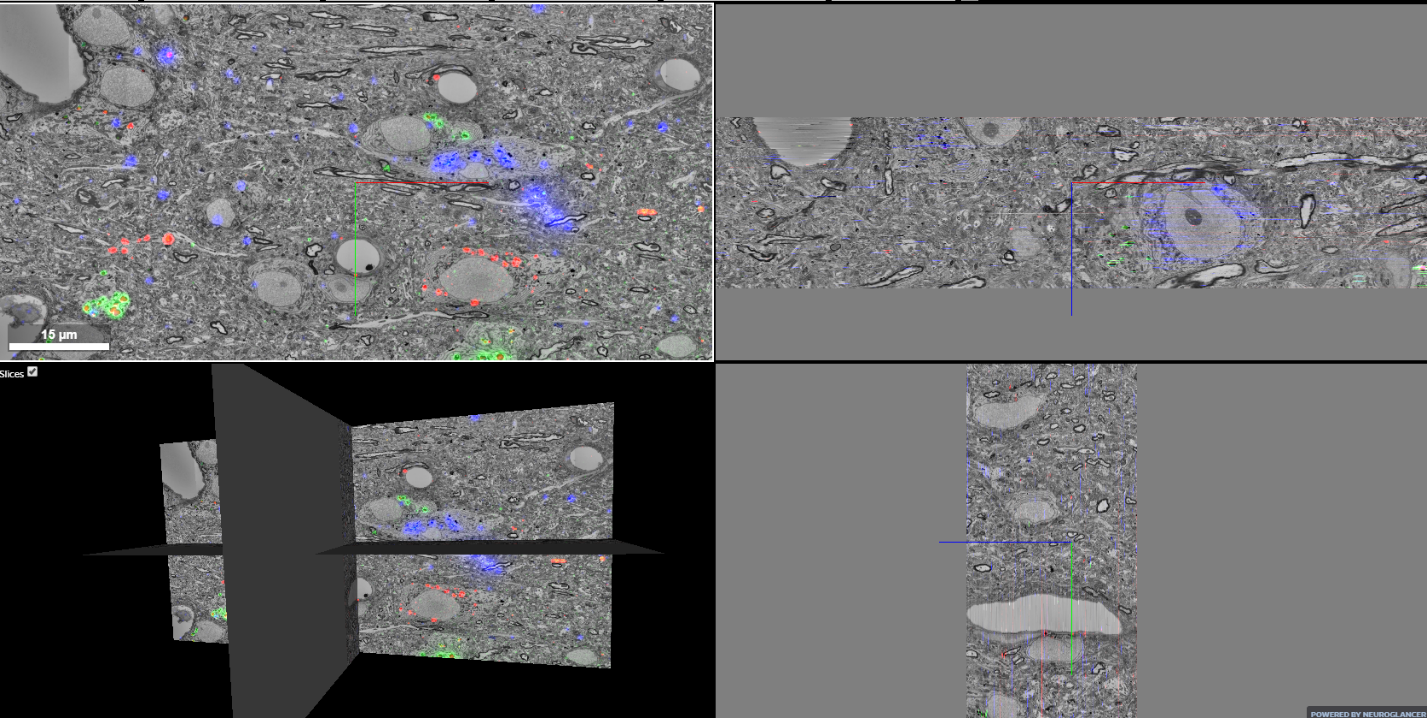

Supplement: supp [file elife-45696-supp-v1.zip › elife_poa_e45696_Figure_2_figure_supplement_6.png]

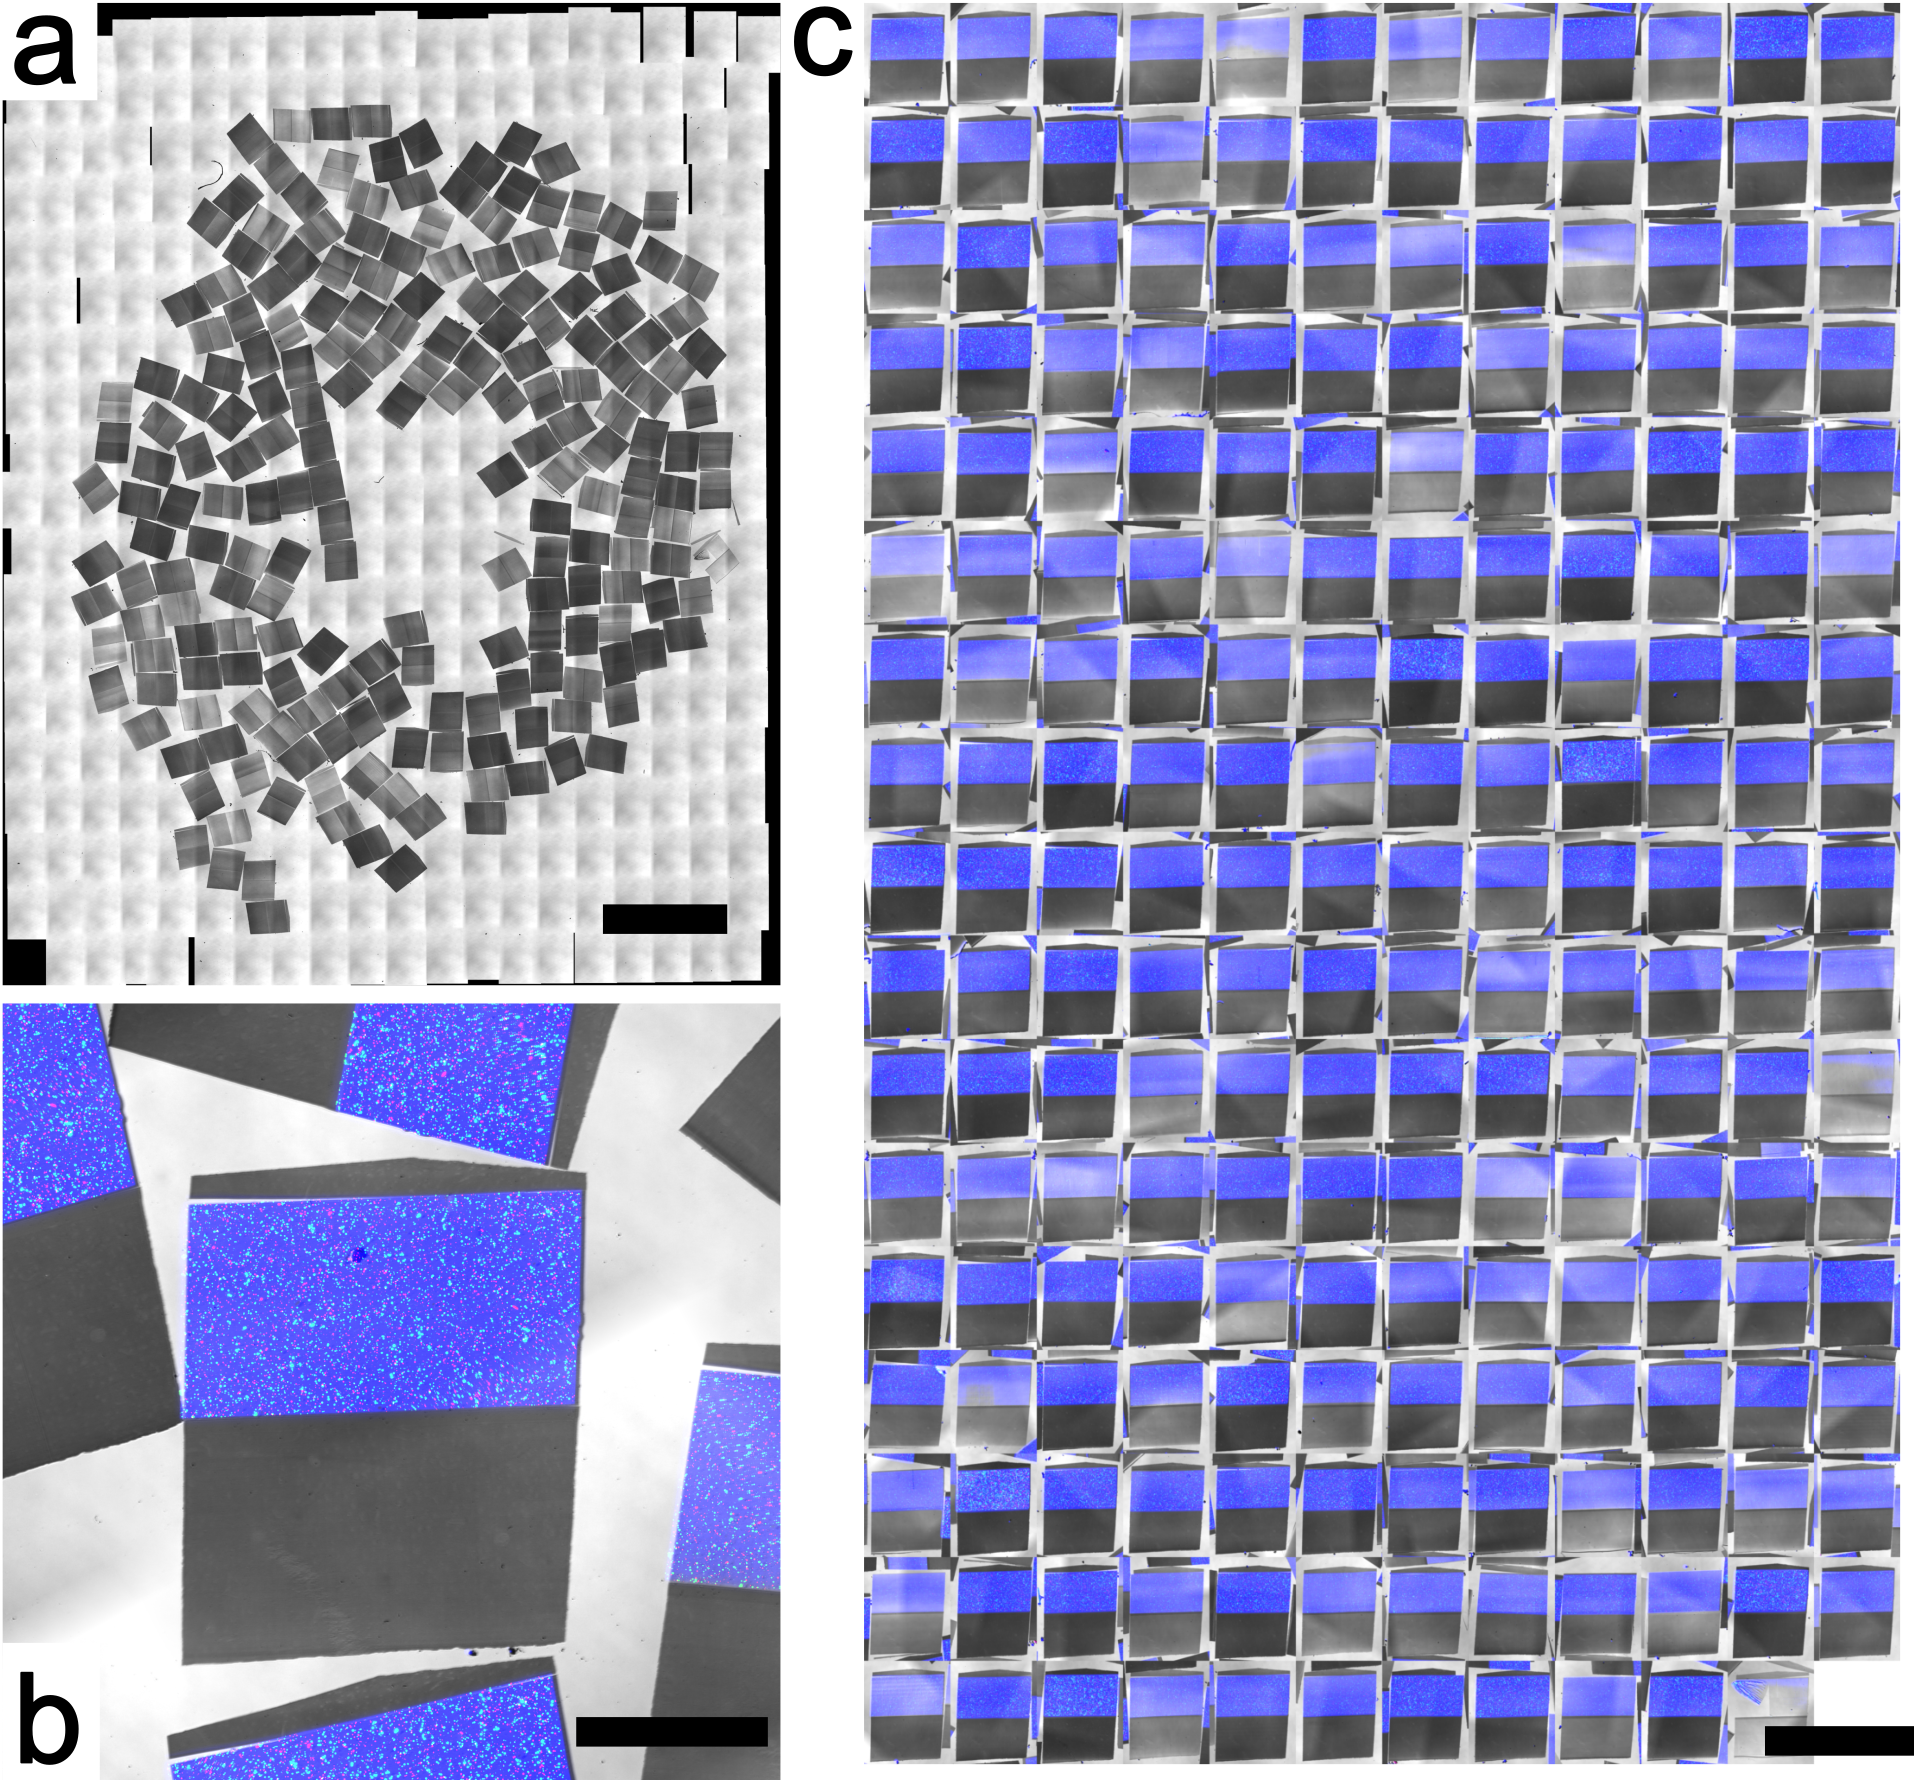

Supplement: supp [file elife-45696-supp-v1.zip › elife_poa_e45696_Figure_1_figure_supplement_1.png]

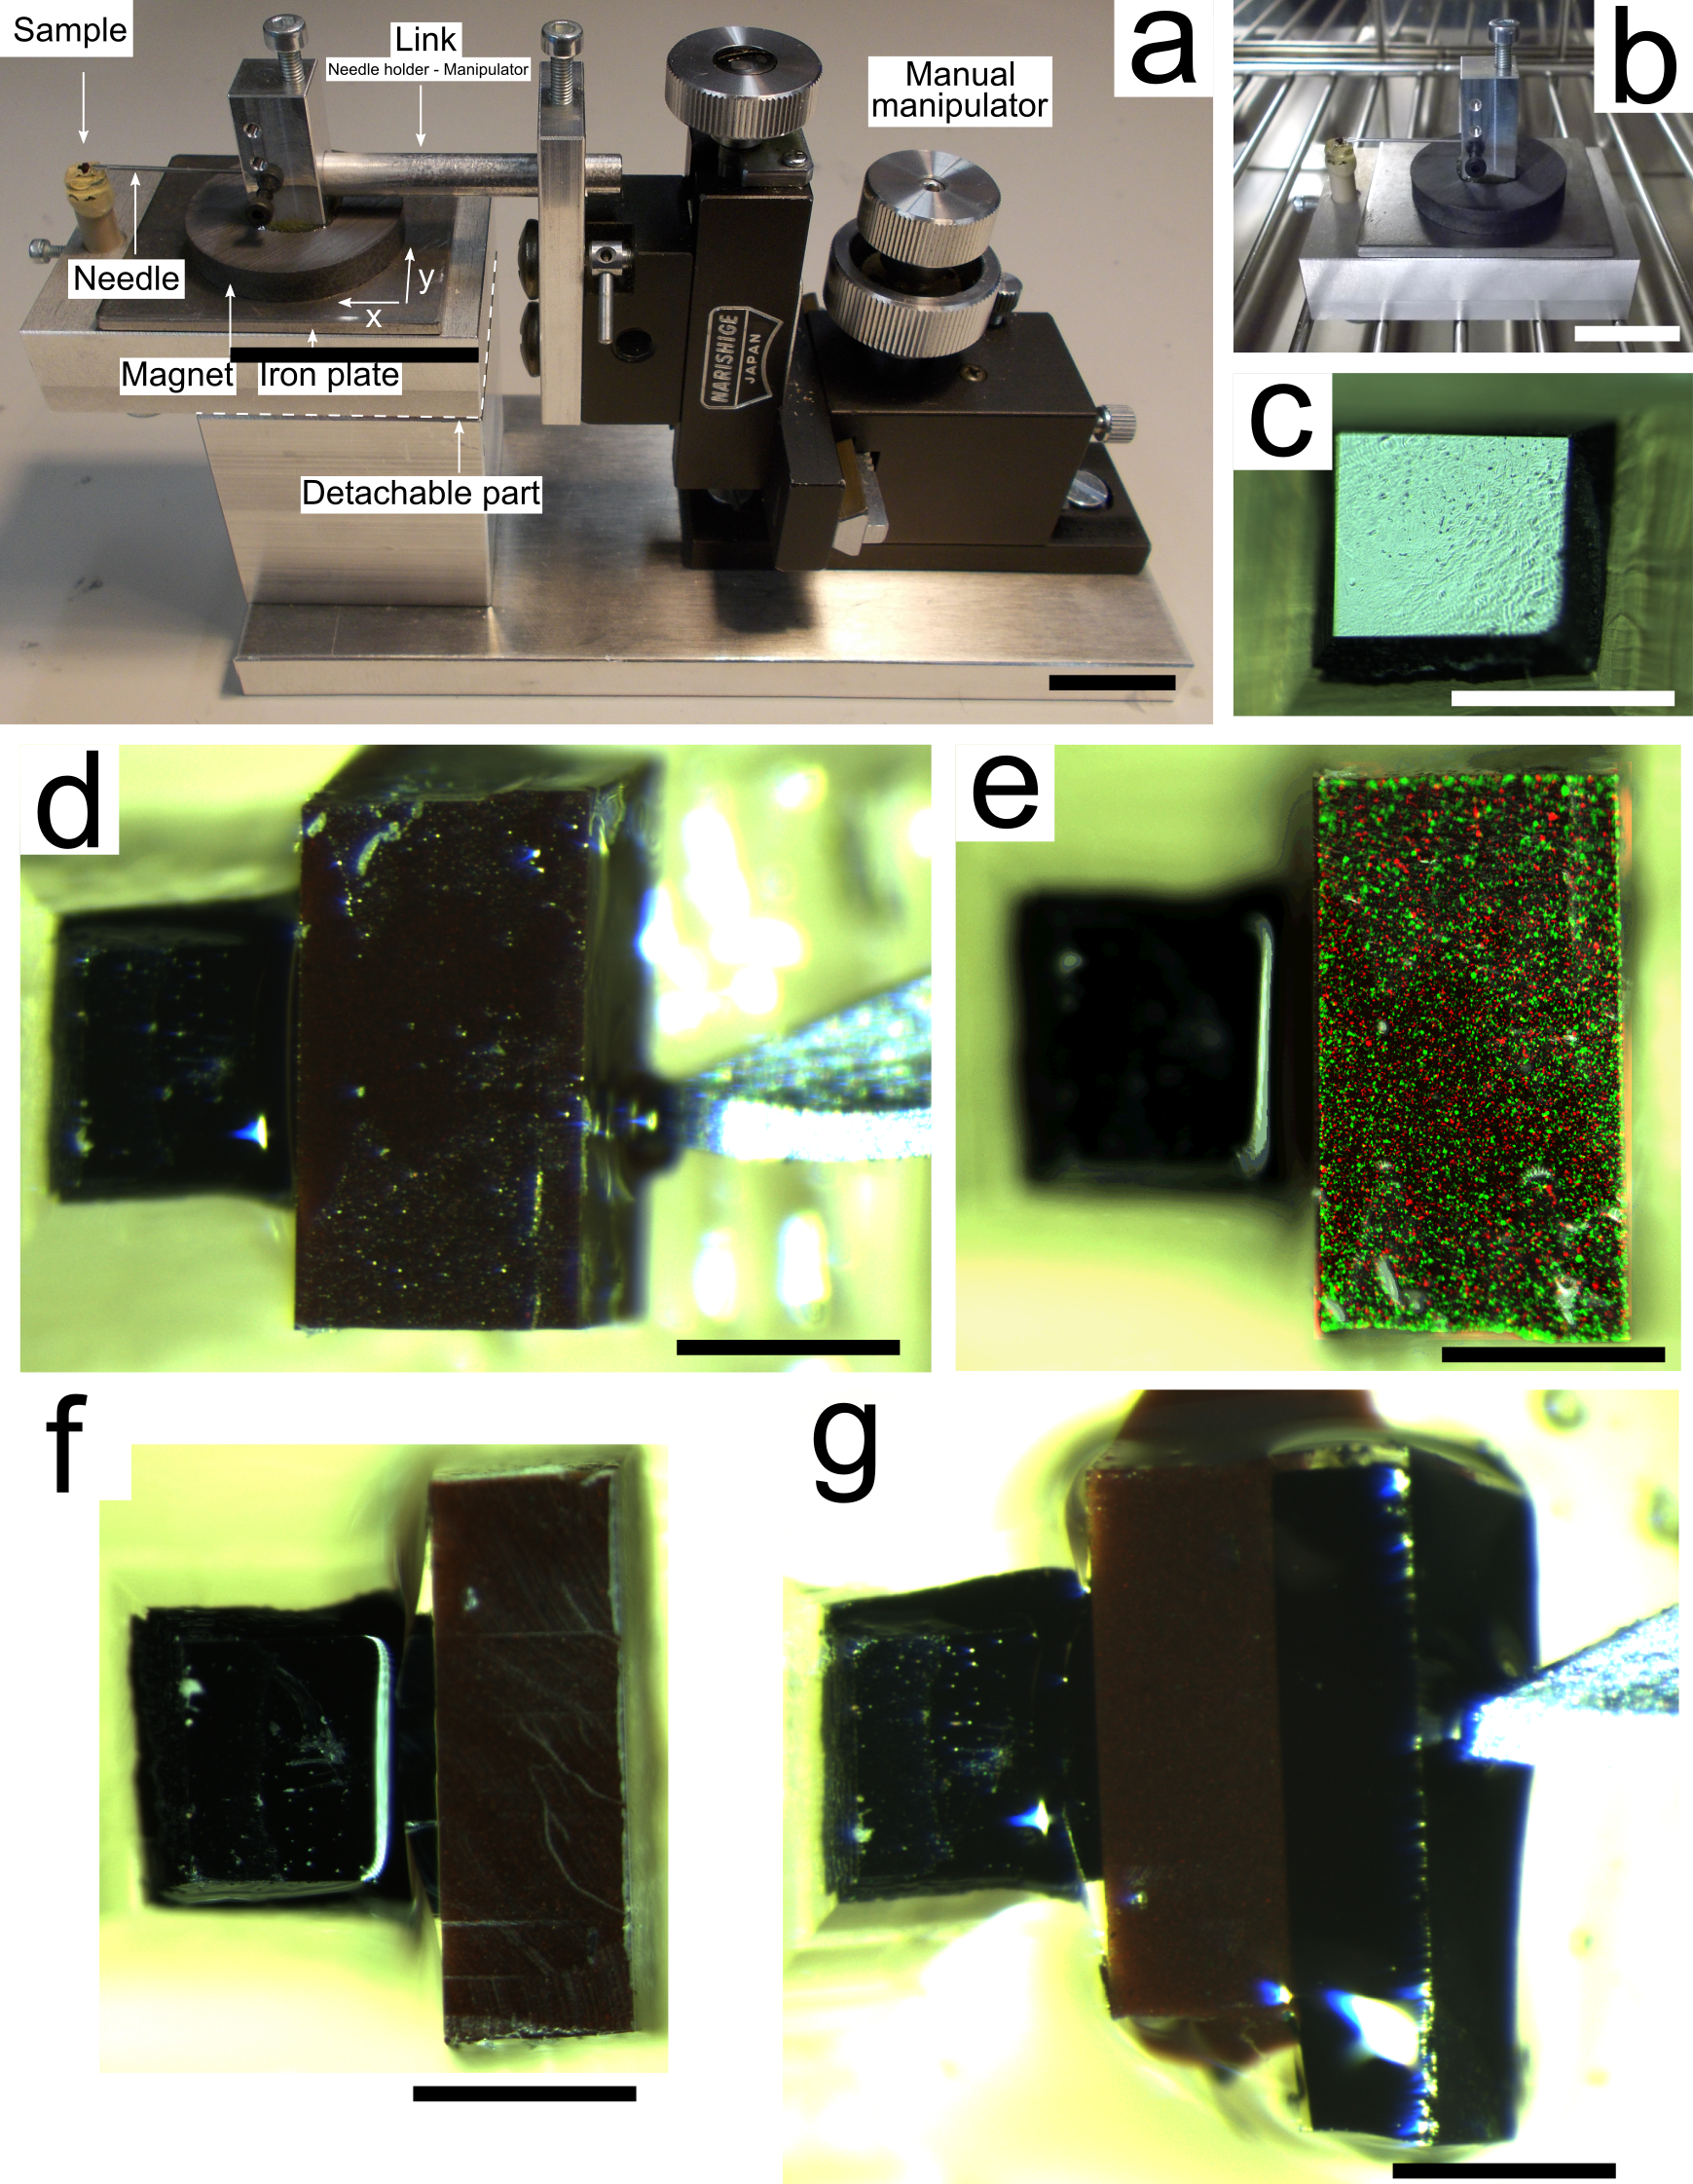

Supplement: supp [file elife-45696-supp-v1.zip › elife_poa_e45696_Figure_1_figure_supplement_3.png]

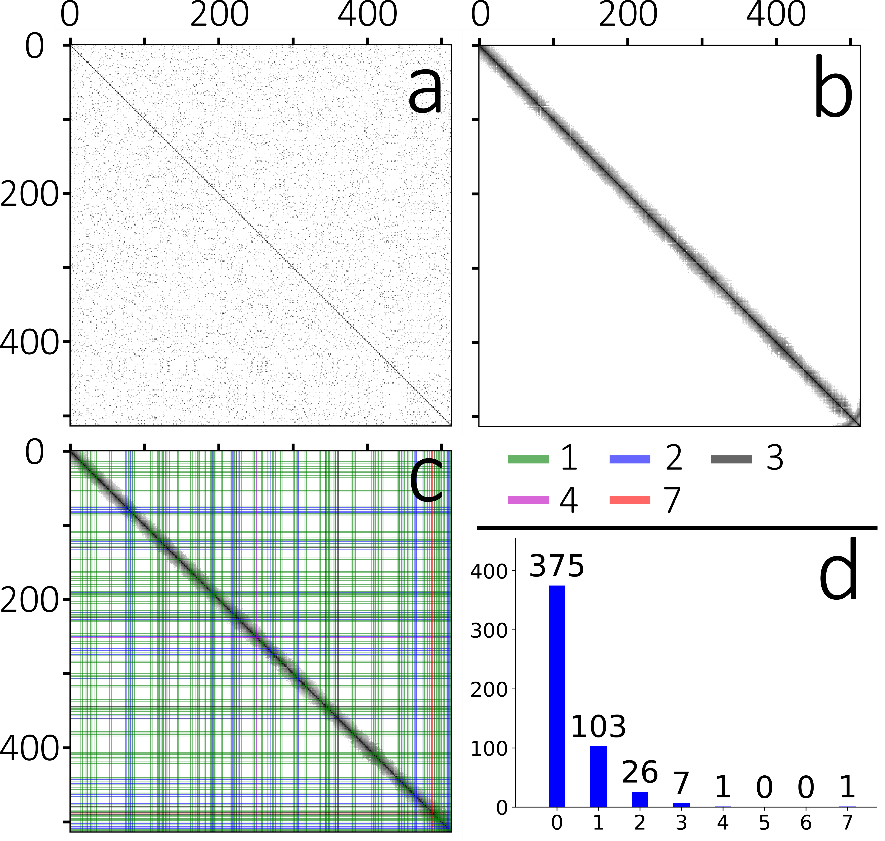

Supplement: supp [file elife-45696-supp-v1.zip › elife_poa_e45696_Figure_2_figure_supplement_1.png]

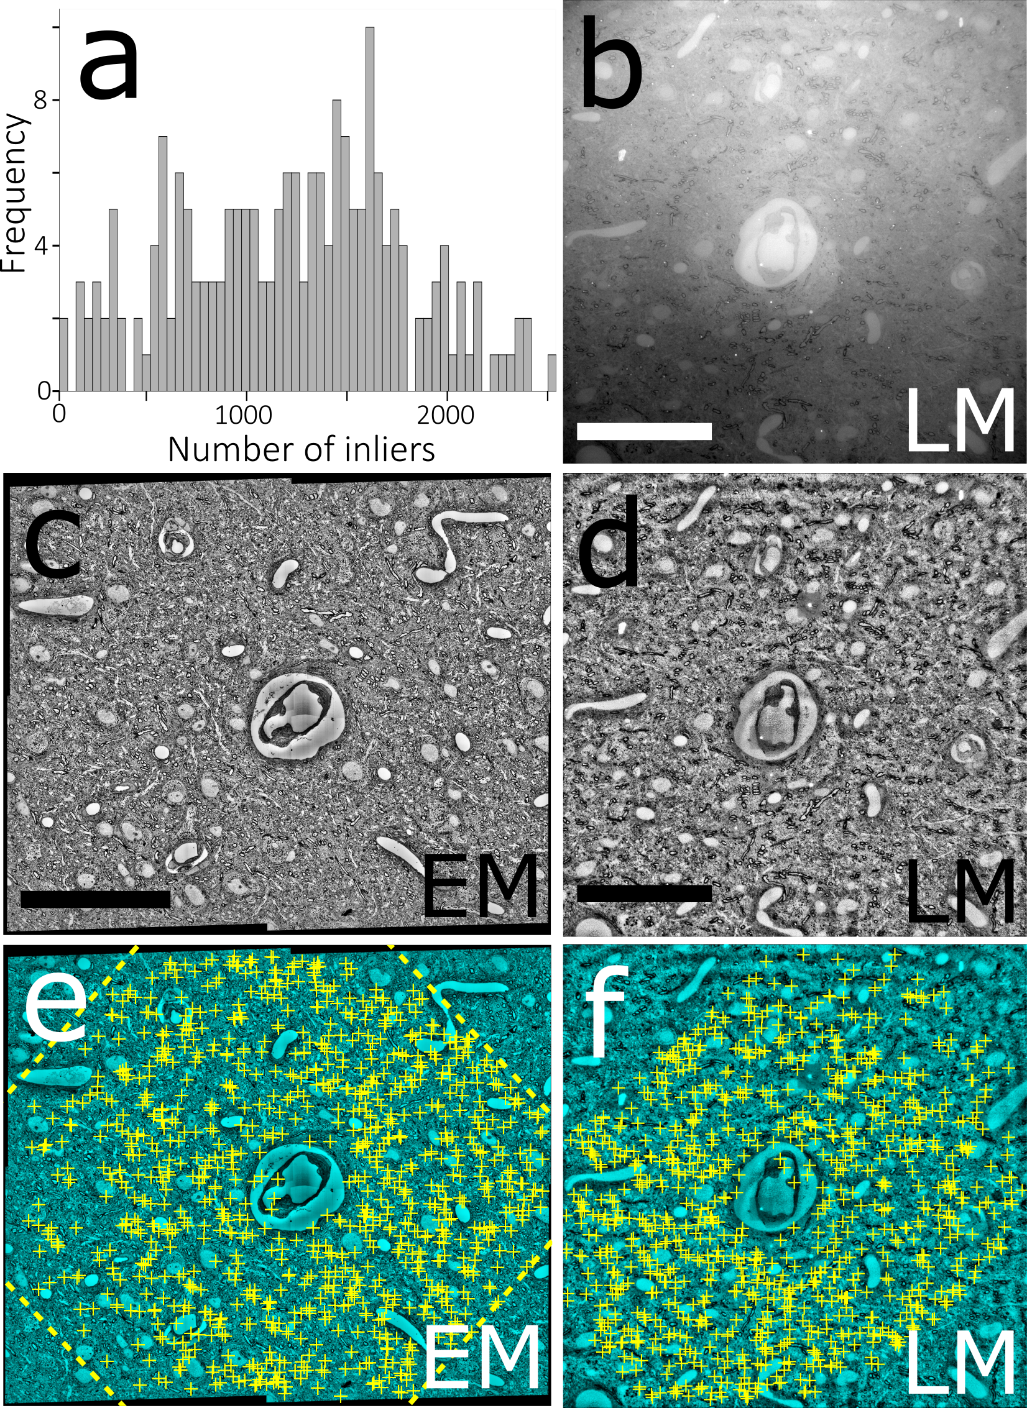

Supplement: supp [file elife-45696-supp-v1.zip › elife_poa_e45696_Figure_2_figure_supplement_2.png]

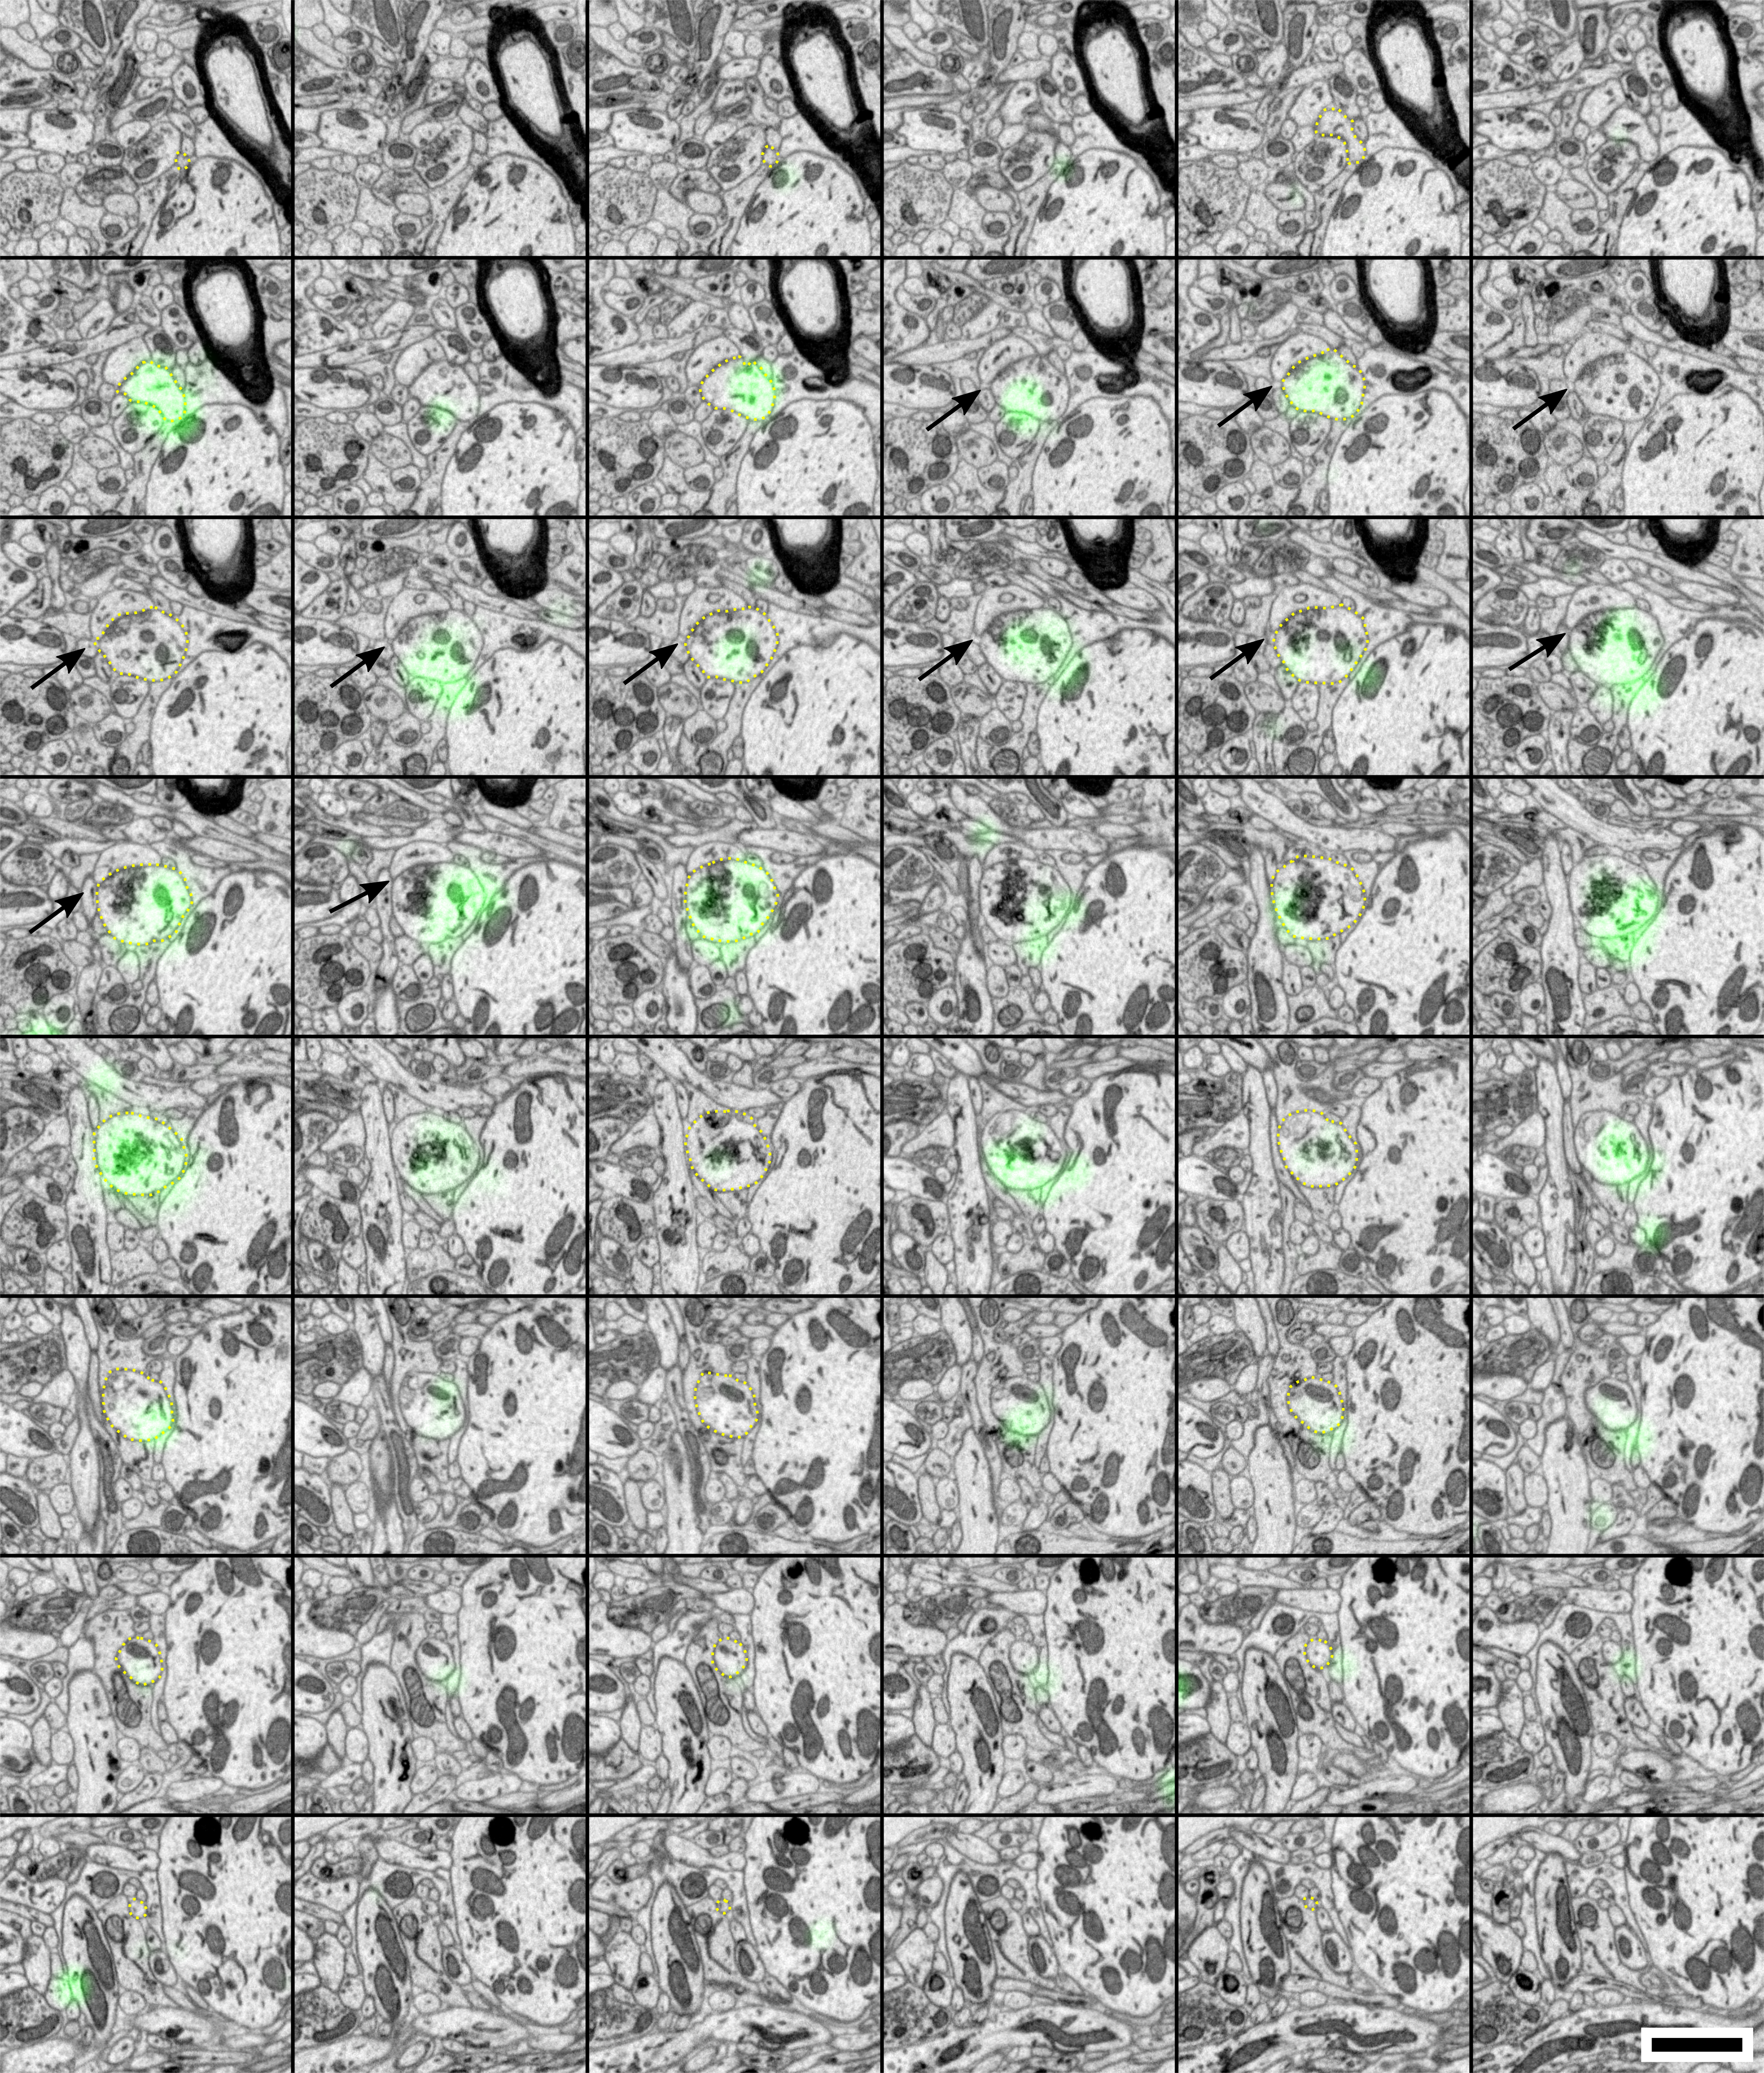

Supplement: supp [file elife-45696-supp-v1.zip › elife_poa_e45696_Figure_2_figure_supplement_4.png]

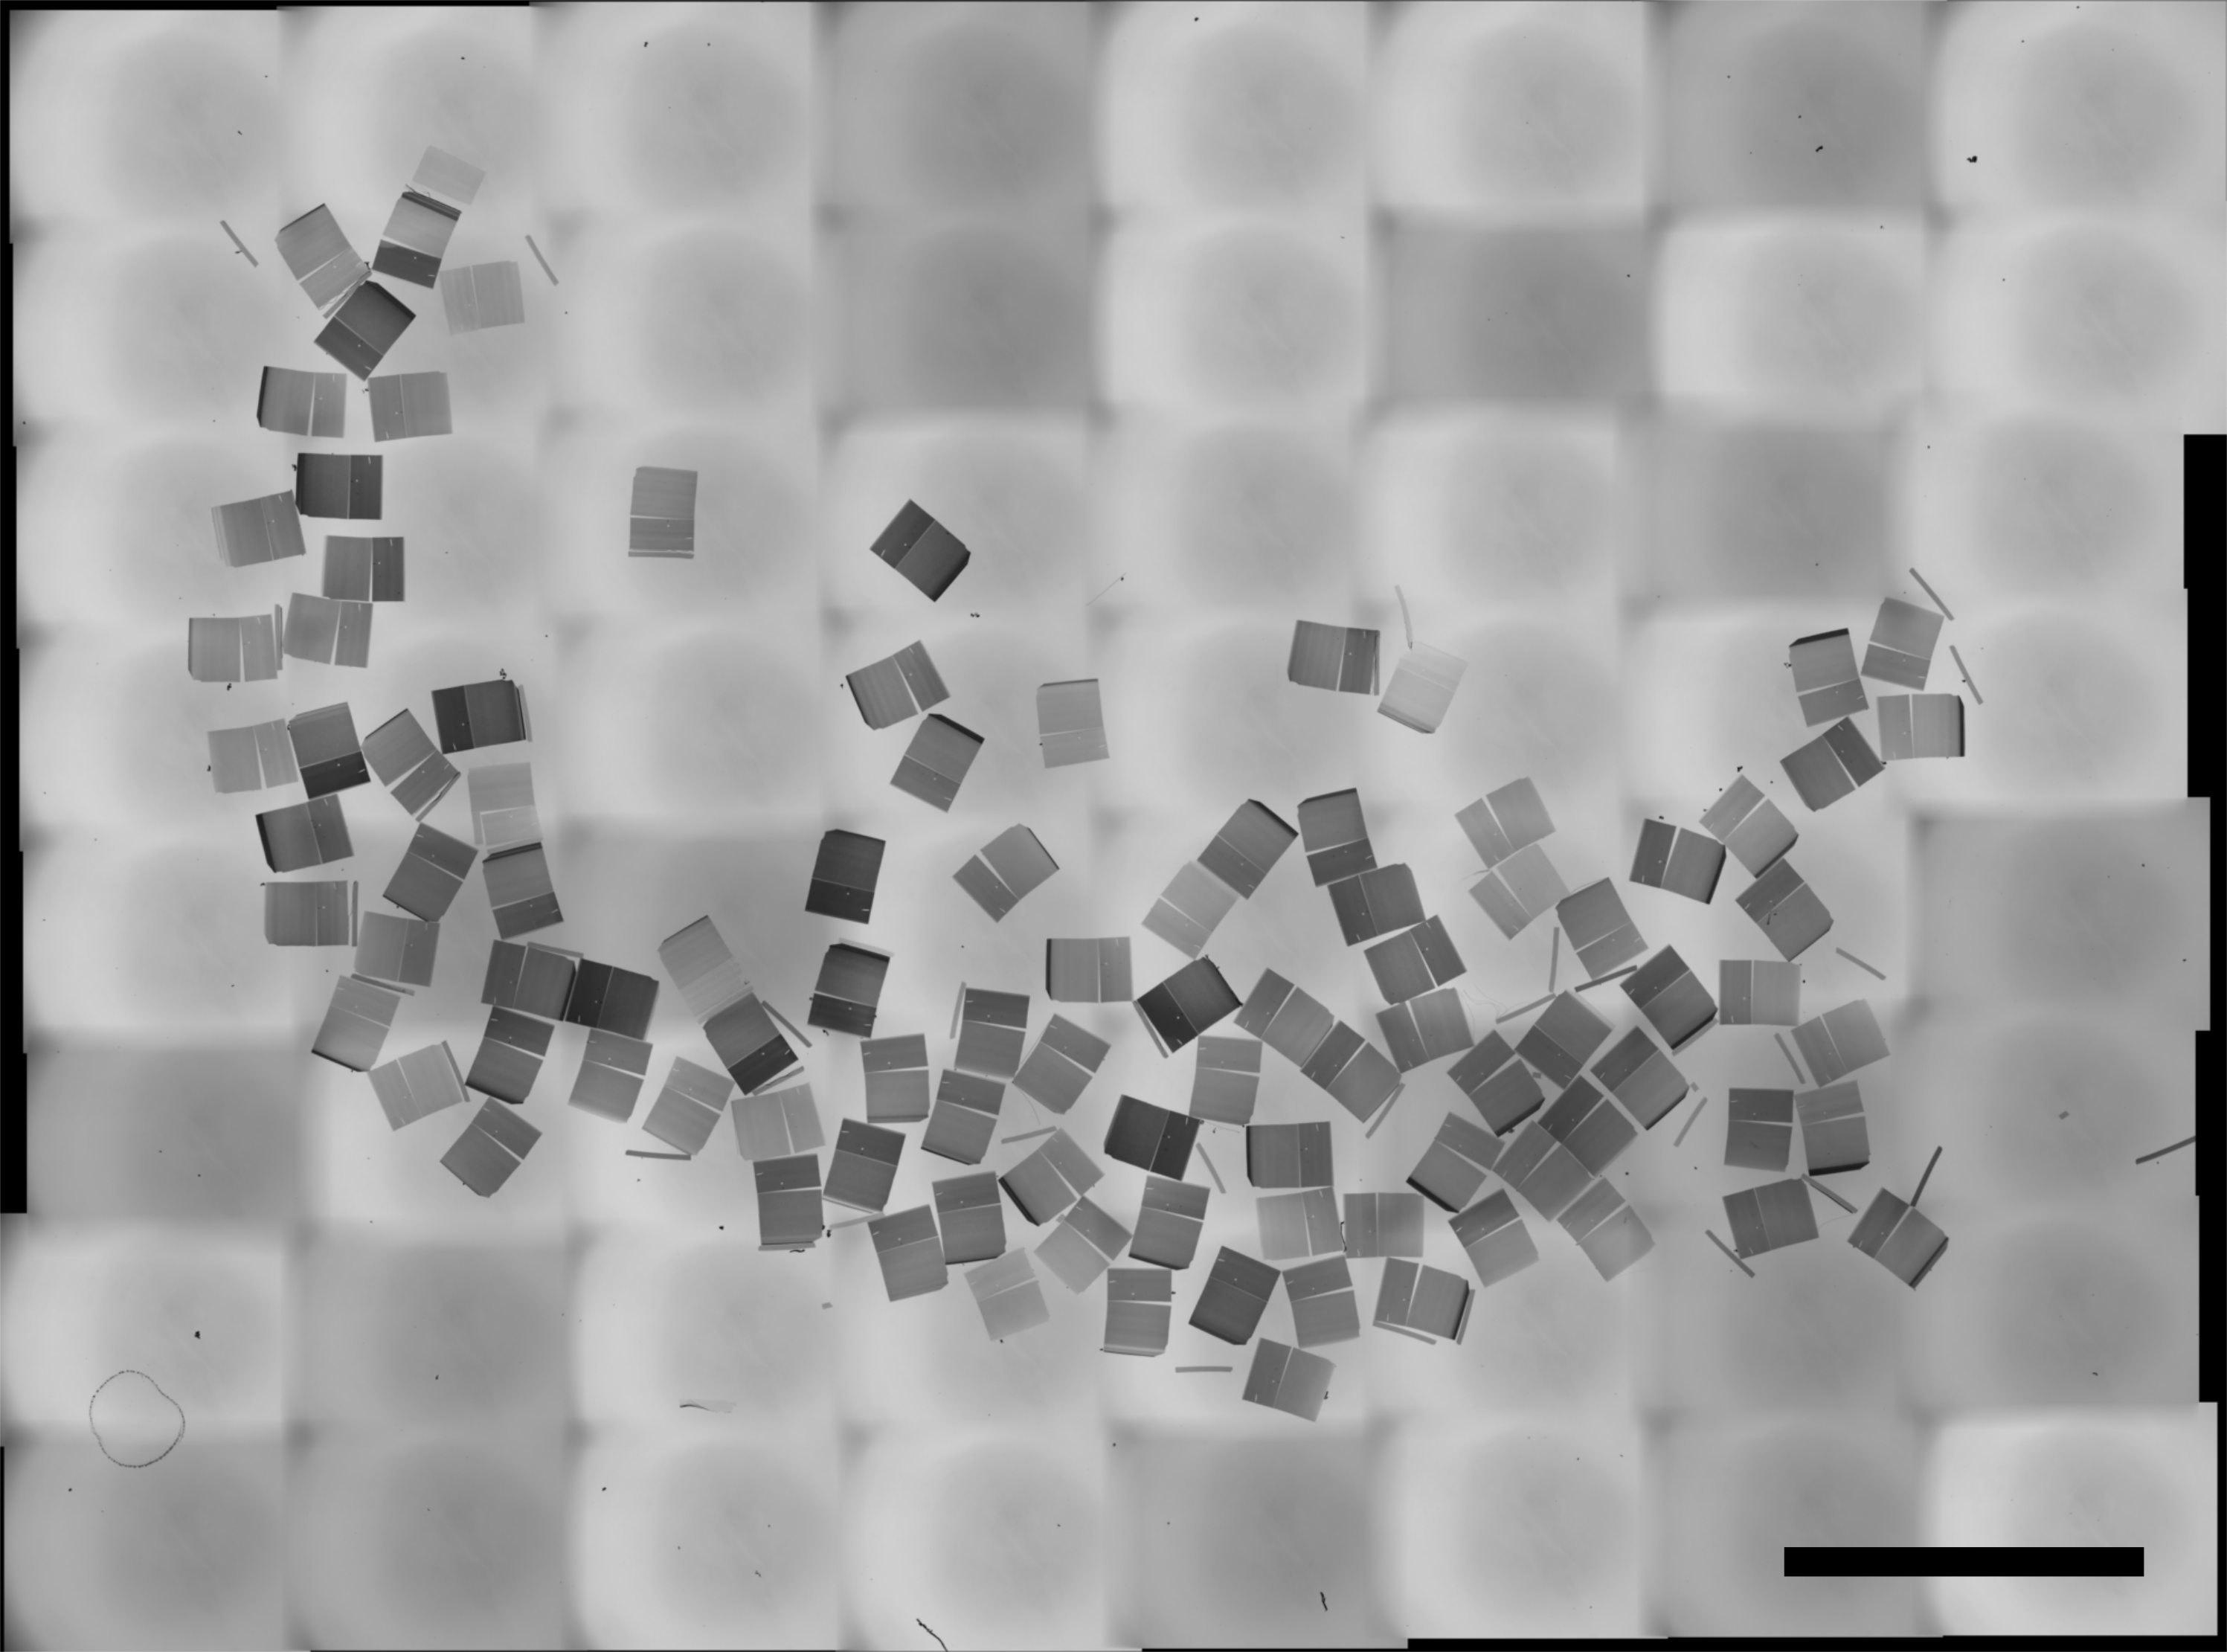

Supplement: supp [file elife-45696-supp-v1.zip › elife_poa_e45696_Figure_1_figure_supplement_4.png]

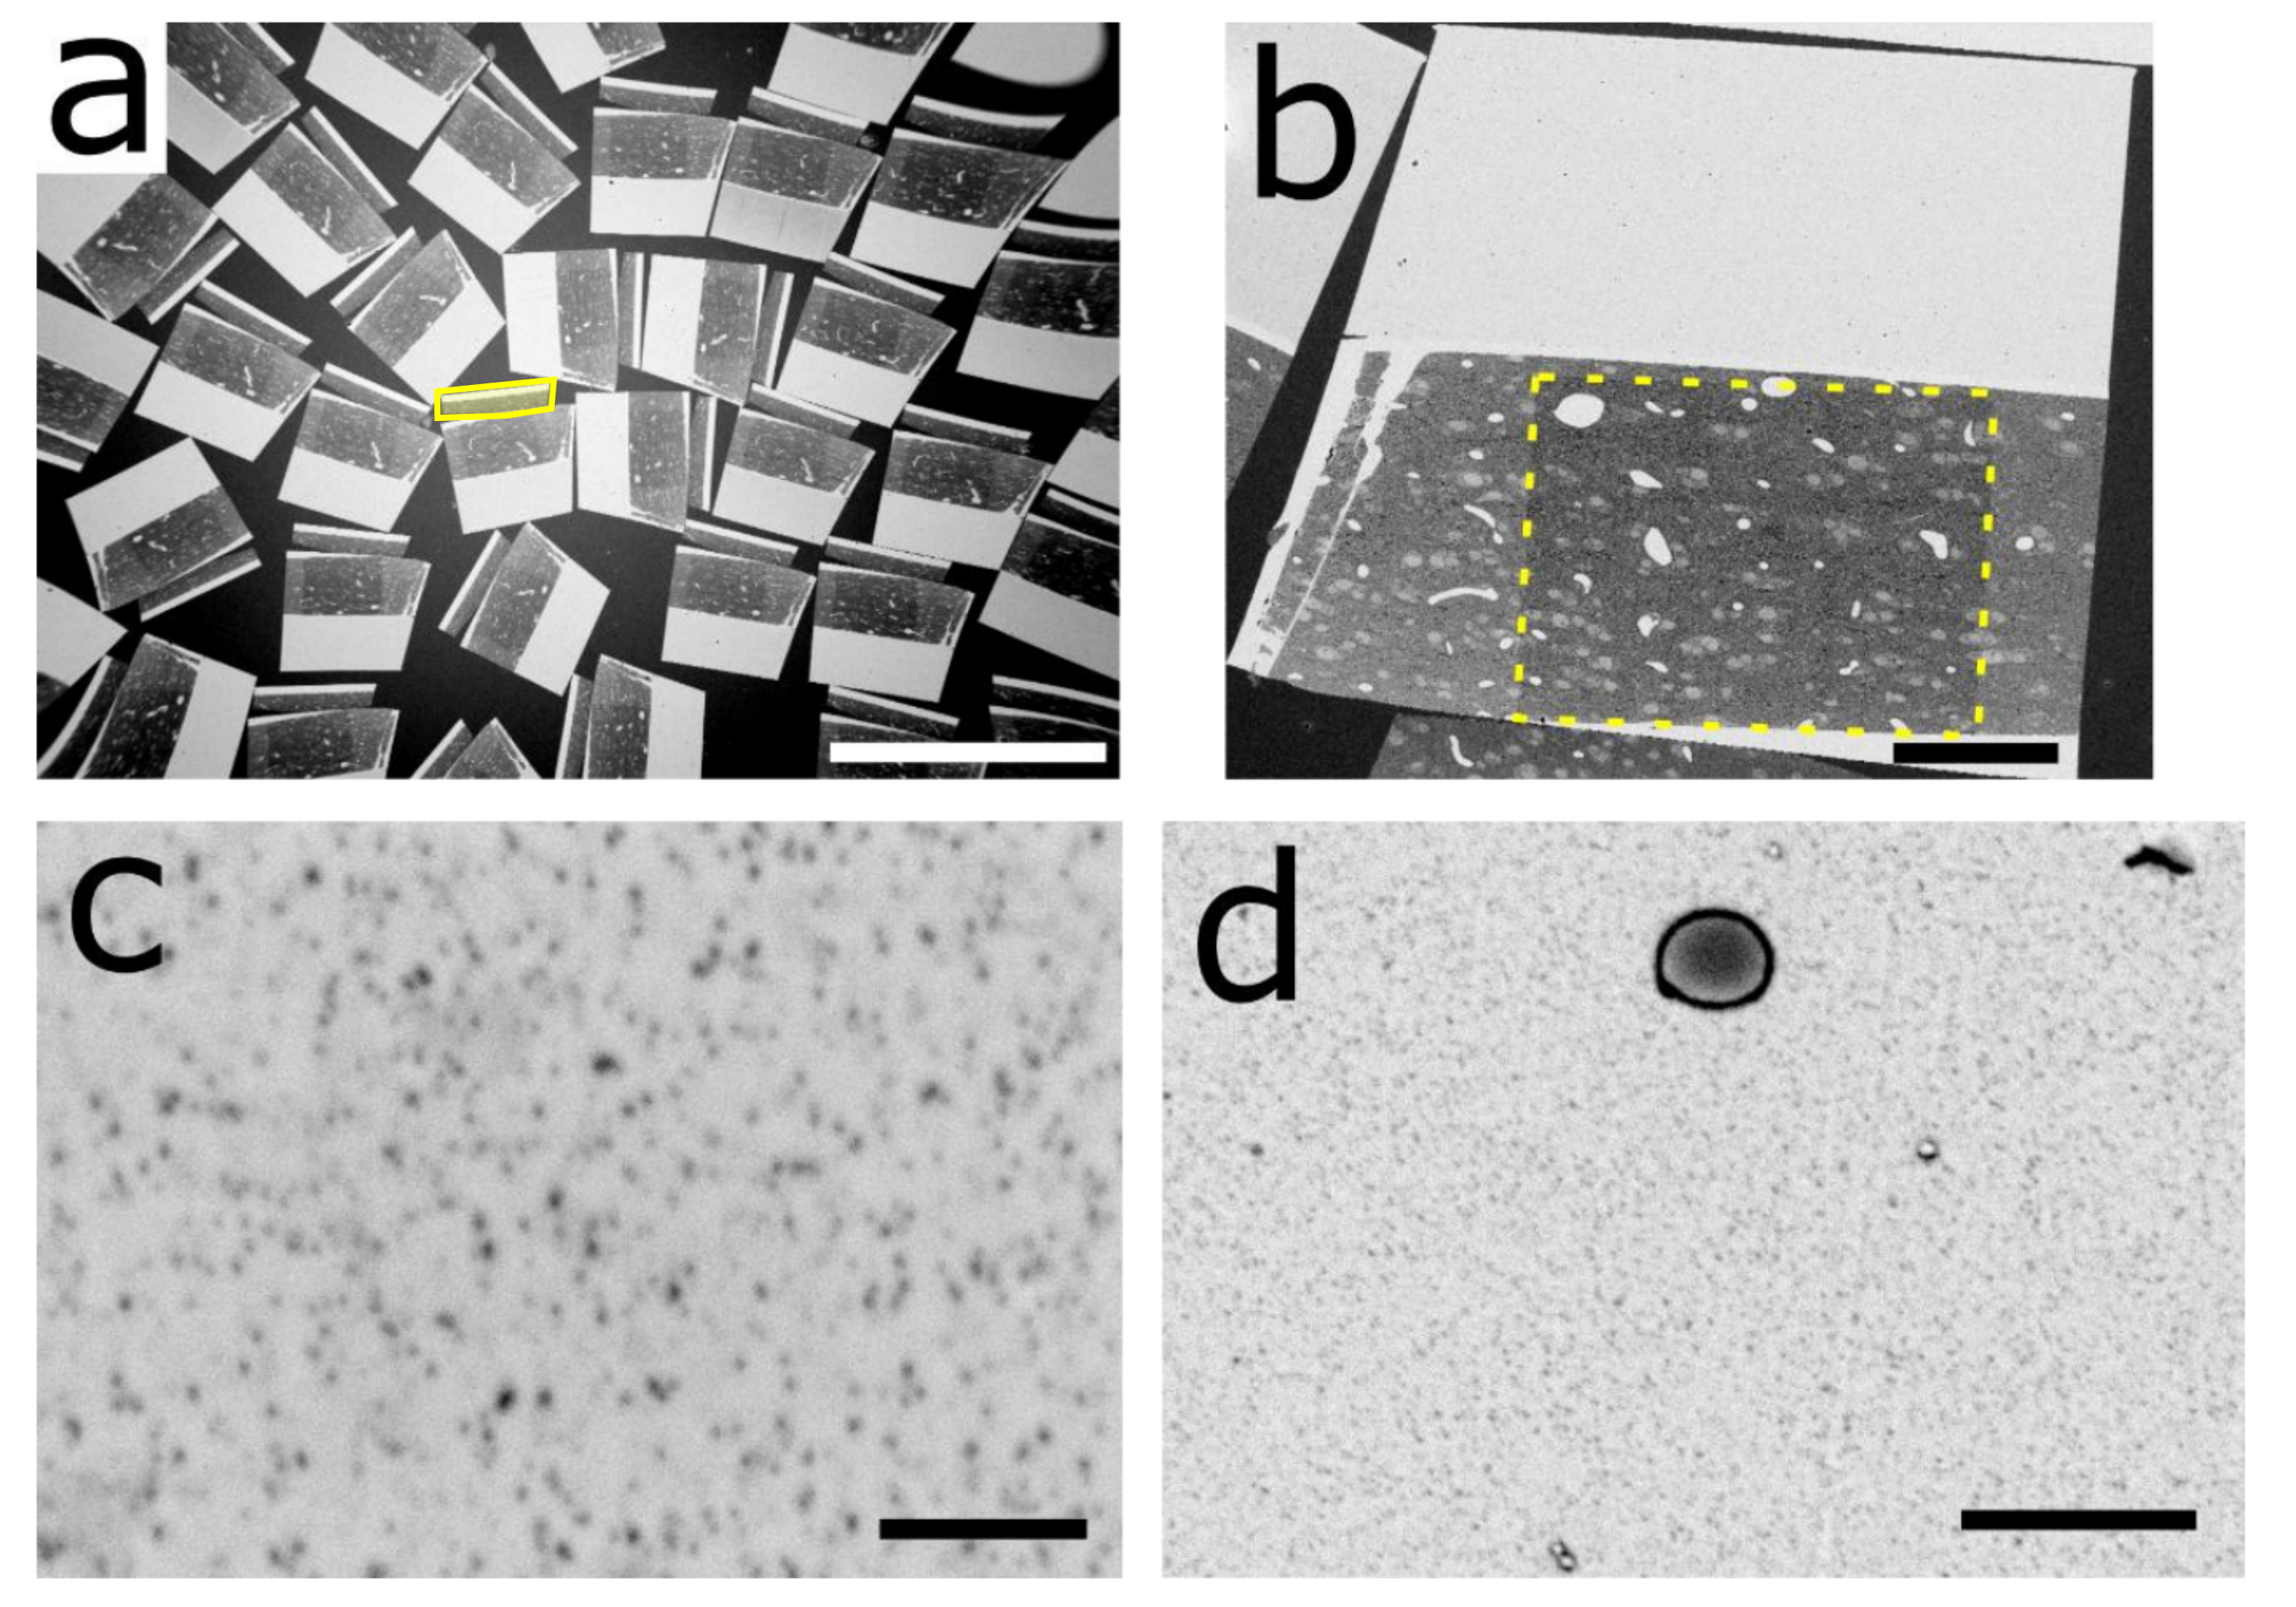

Supplement: supp [file elife-45696-supp-v1.zip › elife_poa_e45696_Figure_1_figure_supplement_2.png]

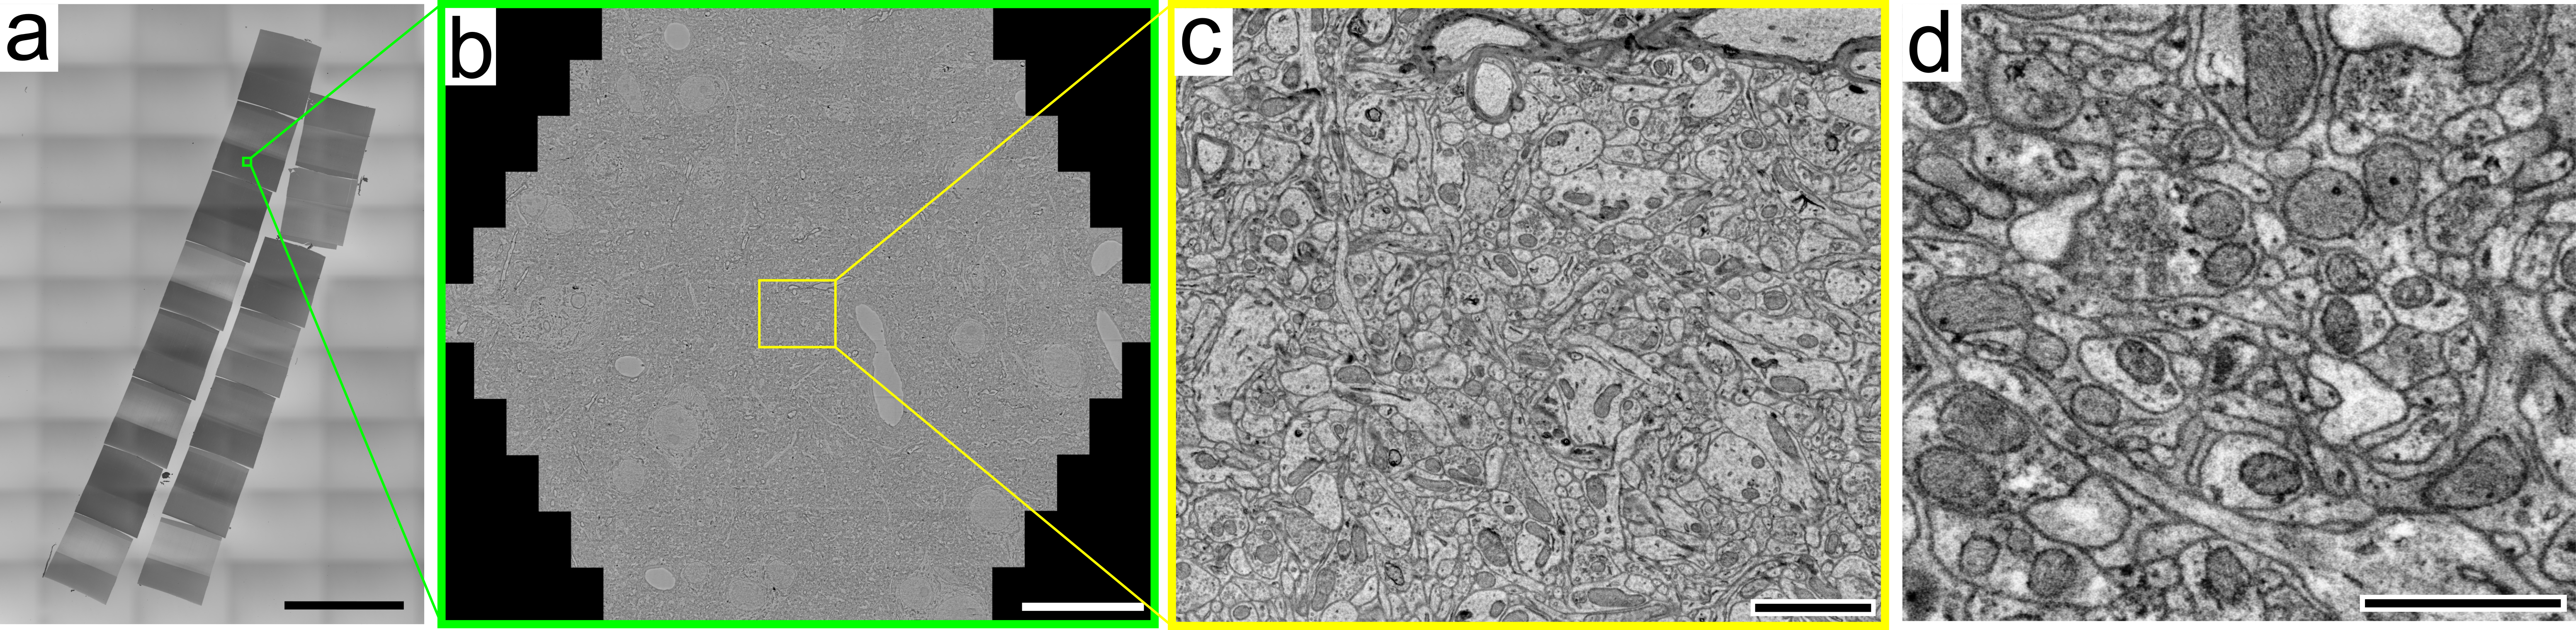

Supplement: supp [file elife-45696-supp-v1.zip › elife_poa_e45696_Figure_1_figure_supplement_5.png]

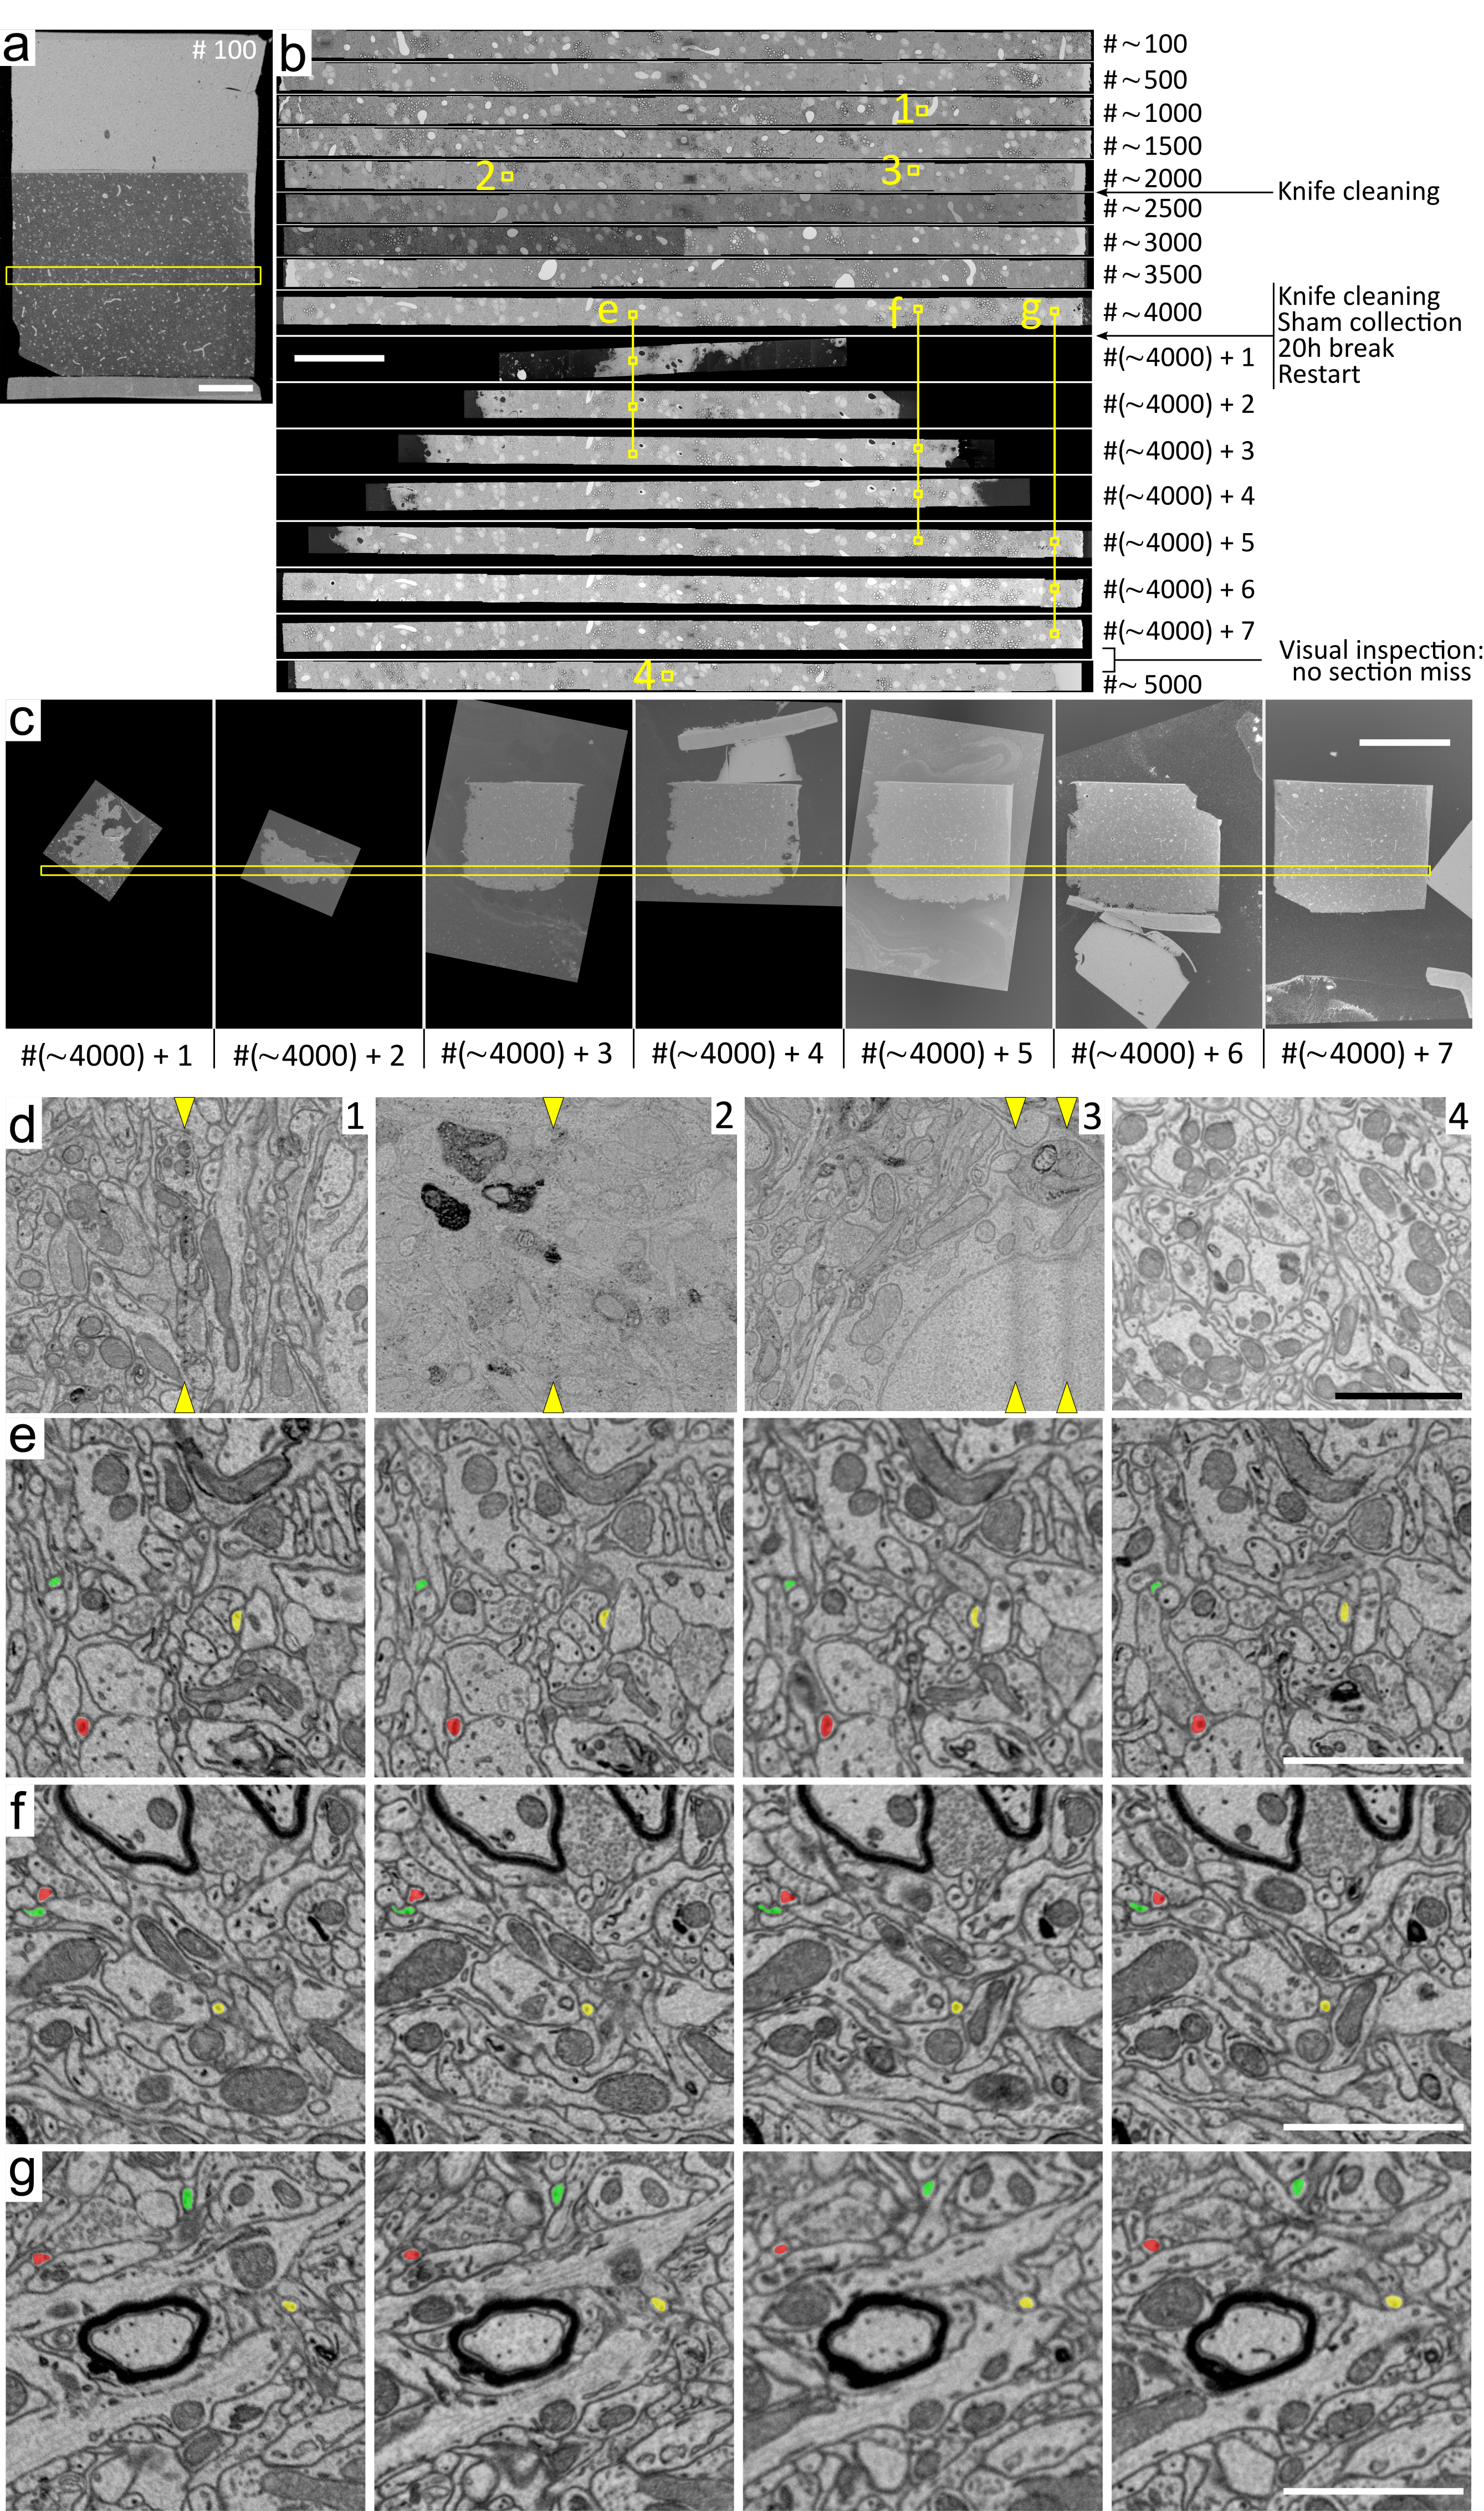

Supplement: supp [file elife-45696-supp-v1.zip › elife_poa_e45696_Figure_2_figure_supplement_3.png]
